# Supplementary material for: Increase of dissolved inorganic carbon and decrease of pH in near surface waters of the Mediterranean Sea during the past two decades
Source: Copernicus journal article supplement (doi:10.5194/bg-2017-284), 2017-07-06
Supplement: Supplementary file [file bg-2017-284-AC3-supplement.pdf]

**Increase of dissolved inorganic carbon and decrease of pH in near surface waters of the Mediterranean Sea during the past two decades**

Liliane. Merlivat <sup>a</sup>, Jacqueline. Boutin <sup>a</sup>, David. Antoine <sup>b,c</sup>, Laurence. Beaumont <sup>d</sup>, Melek. Golbol <sup>b</sup>, Vincenzo. Vellucci. <sup>b</sup>

<sup>a</sup> Sorbonne Universités (UPMC, Univ Paris 06)-CNRS-IRD-MNHN, LOCEAN Laboratory, F-75005 Paris, France

<sup>b</sup> Sorbonne Universités (UPMC, Univ Paris 06)-CNRS, LOV, Observatoire Océanologique, Villefranche-sur-Mer 06230, France

<sup>c</sup> Remote Sensing and Satellite Research Group, Department of Physics and Astronomy, Curtin University, Perth, WA 6845, Australia

<sup>d</sup> Division Technique INSU-CNRS, 92195 Meudon Cedex, France

Corresponding author: L. Merlivat (merlivat@locean.upmc.fr)

**Abstract**

Two three-year-long time series of hourly measurements of the fugacity of CO<sub>2</sub> (fCO<sub>2</sub>) in the upper 10m of the surface layer of the northwestern Mediterranean Sea have been recorded by CARIOCA sensors almost two decades apart, in 1995-1997 and 2013-2015. By combining them with alkalinity derived from measured temperature and salinity, we calculate changes of pH and dissolved inorganic carbon (DIC). DIC increased in surface seawater by ~ 25 μmol kg<sup>-1</sup> and fCO<sub>2</sub> by 40 μatm, whereas seawater pH decreased by ~ 0.04 (0.0022 yr<sup>-1</sup>). The DIC increase is about 15% larger than expected from equilibrium with atmospheric CO<sub>2</sub>. This could result from the increase between the two periods in the frequency and intensity of winter convection events. Likewise, it could be the signature of the contribution of the Atlantic Ocean as a source of anthropogenic carbon to the Mediterranean Sea through the strait of Gibraltar. Under this assumption, we estimate that the part of DIC accumulated over

32 the last 18 years represents ~30% of the total change of anthropogenic carbon since the  
33 beginning of the industrial period.

34

## 35 **1 Introduction**

36 The concentration of atmospheric carbon dioxide (CO<sub>2</sub>) has been increasing rapidly over the  
37 20<sup>th</sup> century and, as a result, the concentration of dissolved inorganic carbon (DIC) in the near  
38 surface ocean increases, which drives a decrease in pH in order to maintain a chemical  
39 equilibrium [Millero, 2007]. These changes have complex direct and indirect impacts on  
40 marine organisms and ecosystems [Gattuso and Hansson, 2011]. Empirical methods to  
41 estimate the anthropogenic CO<sub>2</sub> penetration in the ocean since the industrial revolution have  
42 improved over the past few decades [Chen and Millero, 1979; Gruber et al., 1996]; [Sabine et  
43 al., 2008]; [Touratier and Goyet, 2004; 2009; Woosley et al., 2016]. As the concentration of  
44 anthropogenic carbon, C<sub>ant</sub>, cannot be distinguished from the natural background of DIC  
45 through total DIC measurements, these methods are based on the analysis of different  
46 chemical properties of the water column. Direct estimates of the anthropogenic CO<sub>2</sub>  
47 absorption in the sea surface layers are difficult owing to the large natural variability driven  
48 by physical and biological phenomena. [Bates et al., 2014] have extracted the trend from the  
49 large variability, based on analysis of a long time series (monthly or seasonal sampling). For  
50 the global surface ocean, [Lauvset et al., 2015] have used the Surface Ocean CO<sub>2</sub> Atlas  
51 (SOCAT) database [Bakker et al., 2014] combined with an interpolation method. Constraints  
52 on the Mediterranean Sea's storage of anthropogenic CO<sub>2</sub> are limited, as the data based  
53 approaches disagree by more than a factor of two [Huertas et al., 2009; Touratier and Goyet,  
54 2009]. In addition to the anthropogenic signal, oceanic DIC can also be the signature of a  
55 strong interannual variability. In the North Atlantic, for instance it has been shown that  
56 because of decadal variability it requires 25 years for the long-term trend to emerge  
57 [McKinley et al., 2011][McKinley et al., 2011][McKinley et al., 2011][McKinley et al., 2011].

58 A high frequency sampling of the seawater carbon chemistry at the air-water interface over  
59 extended periods of time is a way to detect a possible trend in DIC. In this paper we analyze  
60 two three-year time series of hourly fugacity of CO<sub>2</sub>, fCO<sub>2</sub>, measured with autonomous  
61 CARIOCA sensors [Copin-Montégut et al., 2004; Merlivat and Brault, 1995] in 1995-1997  
62 and 2013-2015, at two very close locations in the northwestern Mediterranean Sea (Fig. 1).  
63 Using measured fCO<sub>2</sub>, temperature (T) and salinity (S), we derive the other variables of the

64 carbonate system (pH and DIC). The experimental setting is first described, and the recent  
65 data obtained over the 2013-2015 period are presented. Combined with the 1995-1997  
66 measurements previously published [Hood and Merlivat, 2001], we estimate the decrease of  
67 pH and the increase of DIC. The results are discussed with respect to the contributions of the  
68 exchange with atmospheric CO<sub>2</sub>, to the possible impact of vertical mixing and to recent  
69 estimates of the transport of anthropogenic carbon from the Atlantic Ocean over a 18 years  
70 period.

71

## 72 2 Material and methods

### 73 2.1-The BOUSSOLE and DYFAMED sites

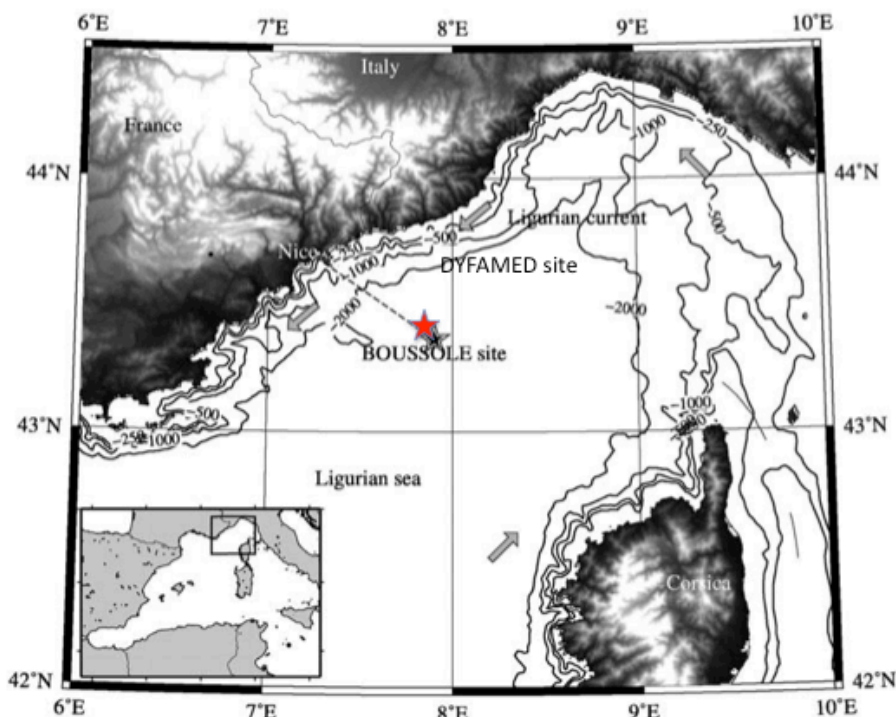

Fig. 1. The area of the northwestern Mediterranean Sea showing the southern coast of France, the island of Corsica, the main current branches (gray arrows), and the location of the DYFAMED site (red star) and the BOUSSOLE buoy (black star) in the Ligurian Sea.

74

75 Data collection was carried out at the BOUSSOLE site (43°22'N, 7°54'E) in 2013-2015  
76 [Antoine *et al.*, 2008; Antoine. and others, 2006] and at the DYFAMED site (43°25'N,  
77 7°52'E) in 1995-1997 [Marty *et al.*, 2002]. These sites are 3 nautical miles apart, both located  
78 in the Ligurian Sea, one of the basins of the northwestern Mediterranean Sea (Fig.1). The  
79 water depth is of ~2400 m. The prevailing ocean currents are usually weak (<20 cm s<sup>-1</sup>),  
80 because these sites are in the central area of the cyclonic circulation that characterizes the  
81 Ligurian Sea. The two sites surrounded by the permanent geostrophic Ligurian frontal jet

82 flow are protected from coastal inputs [*Antoine et al.*, 2008; *Heimbürger et al.*, 2013; *Millot*,  
83 1999]. Monthly cruises are carried out at the same location .

84

## 85 2.2- Analytical methods

86 At DYFAMED, fCO<sub>2</sub> measurements at 2 m depth were provided by an anchored floating  
87 buoy fitted with a CARIOCA sensor. At BOUSSOLE, measurements were carried out from a  
88 mooring normally dedicated to radiometry and optical measurements, and onto which two  
89 CARIOCA sensors were installed. Both monitored fCO<sub>2</sub> hourly at 3 and 10 meters depth  
90 (although only one of the two depths was equipped with a functional sensor at some periods);  
91 S and T were monitored at the same two depths using a Seabird SBE 37-SM MicroCat  
92 instrument. The CARIOCA sensors were adapted to work under pressure in the water column.  
93 They were swapped about every 6 months, with serviced and calibrated instruments replacing  
94 those having been previously deployed. The accuracy of CARIOCA fCO<sub>2</sub> measurements  
95 using the spectrophotometric method with thymol blue is estimated at 2 µatm during both  
96 periods. [*Hood and Merlivat*, 2001] have reported agreement between fCO<sub>2</sub> measured by  
97 CARIOCA buoys, similar to the one deployed at DYFAMED, with ship based measurements,  
98 during a number of field programs, with an accuracy of 2 µatm and a precision of 5 µatm .

99 At Boussole, newly designed fCO<sub>2</sub> sensors have been calibrated using in situ seawater  
100 samples taken at 5 and 10 meters depth during the monthly servicing cruises to the mooring.  
101 The samples were analyzed using potentiometric titration from the method developed by  
102 [*Edmond*, 1970] with a closed cell, and provides measurements of DIC, and total alkalinity,  
103 Alk. For calibration, Certified Reference Materials (CRMs) provided by Prof. A. Dickson  
104 (Scripps Institution of Oceanography, San Diego, USA) were used. The accuracy is estimated  
105 at 3 µmol kg<sup>-1</sup> for both DIC and Alk. fCO<sub>2</sub> is calculated using the dissociation constants of  
106 Mehrbach refitted by Dickson and Millero [*Dickson and Millero*, 1987; *Mehrbach et al.*,  
107 1973]. Error on fCO<sub>2</sub> derived from an individual sample is expected to be on the order of 5  
108 µatm [*Millero*, 2007]. About 8 samples have been used to calibrate each CARIOCA sensor so  
109 that the error on the absolute calibration of each fCO<sub>2</sub> CARIOCA sensor, is estimated at 1.8  
110 µatm. In addition, we observe that the standard deviation of the difference between the  
111 CARIOCA fCO<sub>2</sub> and fCO<sub>2</sub> computed with the monthly discrete samples (Fig. 2b) is equal to  
112 4.4 µatm, consistent with the expected precision on CARIOCA fCO<sub>2</sub> of 5 µatm. Alk and S of  
113 the 56 samples taken at BOUSSOLE are linearly correlated according the following  
114 relationship :

$$115 \text{ Alk } (\mu\text{mol kg}^{-1}) = 87.647 \text{ S} - 785.5 \quad (1)$$

116 The standard deviation of the Alk data around the regression line is equal to  $4.4 \mu\text{mol kg}^{-1}$   
 117 ( $r^2=0.89$ ).

118

### 119 3 Results

#### 120 3.1 The BOUSSOLE mooring (2013-2015) time series

121 Temperature and  $f\text{CO}_2$  were measured from February 2013 to February 2016. All seasons  
 122 were well represented, with missing data only in May-July 2013. For some periods,  
 123 simultaneous measurements were made at 3 and 10 m depth (Fig. 2, a, b, c).

124

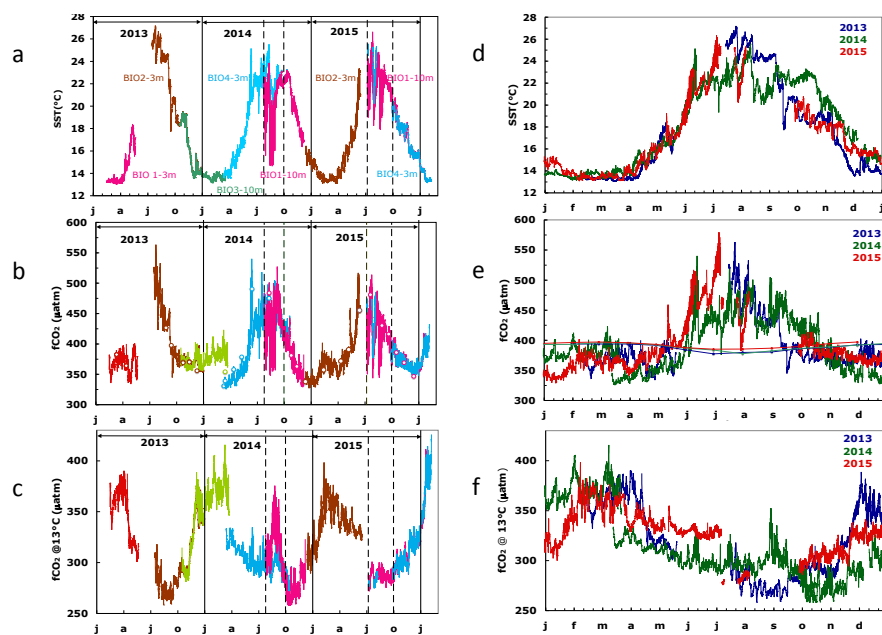

Fig. 2. Interannual variability of CARIOCA data: a) T, b)  $f\text{CO}_2$ , c)  $f\text{CO}_2@13$ . The dotted lines indicate the period affected by stratification and internal waves (July, 26<sup>th</sup> to October 1<sup>st</sup>, 2014 and July, 8<sup>th</sup> to October 1<sup>st</sup>, 2015). On 2(b), the open circles correspond to  $f\text{CO}_2$  data derived from DIC and alkalinity measurements of samples taken at 5 and 10 meters. (d), (e), (f), seasonal variability. On 2(e), the thin lines indicate  $f\text{CO}_{2\text{atm}}$ . Note that the color code on (d), (e), (f) is different from (a), (b), (c).

125

126 The range of temperature (Fig. 2a) extends from  $13^\circ\text{C}$  in winter up to  $27^\circ\text{C}$  in summer,  
 127 followed by progressive cooling in fall. The coldest temperature,  $13^\circ\text{C}$ , results from the  
 128 winter vertical mixing with the deeper Levantine Intermediate Water, LIW, marked by  
 129 extrema in temperature and salinity [Copin-Montegut and Begovic, 2002]. Temperature  
 130 provides the main control of the seasonality of  $f\text{CO}_2$ , from  $350 \mu\text{atm}$  to more than  $550 \mu\text{atm}$  in  
 131 summer 2013 (Fig. 2b). The fugacity of  $\text{CO}_2$  in seawater is a function of temperature, DIC,  
 132 alkalinity, salinity and dissolved nutrients. In the oligotrophic surface waters of the  
 133 Mediterranean sea, this last effect should be negligible. Temperature and DIC have the  
 134 strongest influences. By normalizing  $f\text{CO}_2$  to a constant temperature, the thermodynamic

135 effect can be removed and changes in  $f\text{CO}_2$  resulting from changes in DIC can be more easily  
136 identified. Figure 2c shows the variability of  $f\text{CO}_2$  normalized to the constant temperature of  
137  $13^\circ\text{C}$ , ( $f\text{CO}_2@13$ ), using the equation of [Takahashi *et al.*, 1993]. The underlying processes  
138 that govern the seasonal variability of  $f\text{CO}_2@13$  are successively winter mixing, biological  
139 activity (organic matter formation and remineralization) and deepening of mixed layer in fall  
140 [Begovic and Copin-Montegut, 2002; Hood and Merlivat, 2001]. Biology accounts for the  
141 decline in  $f\text{CO}_2@13$  observed from March-April to late summer; the ensuing increase of  
142 surface  $f\text{CO}_2@13$  is associated with the deepening of the mixed layer in the fall or convection  
143 in winter as the vertical distribution of  $f\text{CO}_2@13$  at DYFAMED shows a maximum in the 50-  
144 150 m layer where a large remineralization of organic matter occurs, the productive layer  
145 being mostly between 0 and 40 m [Copin-Montegut and Begovic, 2002]. The contribution of  
146 air-sea exchange is not significant [Begovic and Copin-Montegut, 2002]. Over the period  
147 2013-2015, the  $\text{CO}_2$  air-sea flux from the atmosphere to the ocean surface is equal to  $-0.45$   
148  $\text{mol m}^{-2} \text{yr}^{-1}$ .

149 During summer 2014, large differences between measurements at 3 and 10 meters were  
150 observed (Fig. 2, a, b, c between dashed lines). A detailed analysis of the temporal  
151 variability during that period underscores the role of inertial waves at the frequency of  
152 17.4 hours that create the observed differences between the 2 depths of observations,  
153 the deeper waters being colder and enriched in  $f\text{CO}_2@13$ . T and  $f\text{CO}_2@13$  variability is  
154 dominated by inertial waves. In particular, from 15 to 26 of August 2014, the difference  
155 in T between the two depths is as large as  $7.6^\circ\text{C}$ , and  $5.1^\circ\text{C}$  on average.  $f\text{CO}_2$  decreases on  
156 average by  $32.7 \mu\text{atm}$  leading to an increase of  $f\text{CO}_2@13$  equal to  $42.8 \mu\text{atm}$ .

157 The 2013-2015 seasonal and inter-annual variability of T,  $f\text{CO}_2$  and  $f\text{CO}_2@13$  is  
158 illustrated on Fig. 2, d, e, f. The larger interannual changes in temperature (Fig.2, d) are  
159 observed during summer, both at 3 m and 10 m depth, while over February and March, a  
160 constant value of  $13^\circ\text{C}$  is observed as the result of vertical mixing with the LIW. A very  
161 large inter-annual variability of  $f\text{CO}_2@13$  is observed for  $T < 14^\circ\text{C}$  (Fig. 2,f). This is  
162 associated with the winter mixing at the mooring site, which is highly variable from year  
163 to year. Winter mixed-layer depth, MLD, varies between 50 and 160 m, at the top of the  
164 LIW over the 2013-2015 period [Coppola *et al.*, 2016]. The variable depth of the winter  
165 vertical mixing causes the difference in  $f\text{CO}_2@13$  as  $f\text{CO}_2$  increases with depth [Copin-  
166 Montegut and Begovic, 2002]. The deepening of MLD is driven by episodic and intense  
167 mixing processes characterized by a succession of events lasting several days, related to

168 atmospheric forcing [Antoine et al., 2008] which lead to increase in  $fCO_2@13$ . Figure 2,e  
169 illustrates the solubility control of the variability of  $fCO_2$ , as  $fCO_2$  increases when T  
170 increases. Another cause of inter-annual variability of  $fCO_2$  for  $T\sim 14^\circ C$  is the timing of  
171 the spring increase of biological activity which differs by a month between years; for  
172 instance, it happened at the beginning of April in 2013,  $T\sim 15-16^\circ C$  and by mid March in  
173 2014,  $T\sim 14^\circ C$ . Another cause is the deepening of the mixed layer due to the fall cooling  
174 which varies by a month between years.

175

## 176 3.2 Decadal changes of hydrography

### 177 3.2.1 Sea surface temperature changes

178 Monthly mean values of temperature have been computed for the two three-year periods,  
179 1995-1997 and 2013-2015. In 1995-1997,  $fCO_2$  and T at 2 m were measured with CARIOCA  
180 sensors installed on a buoy at DYFAMED [Hood and Merlivat, 2001]. The mean annual  
181 temperature of hourly CARIOCA data is equal to  $18.21^\circ C$ . For 2013-2015, temperature  
182 measurements made on the BOUSSOLE mooring at 3 and 10 meters have been used. For the  
183 April to September time interval, there are only data at 3m depth. In addition, temperature  
184 data measured half hourly at 0.7 m at a nearby meteorological buoy ( $43^\circ 23' N$ ,  $7^\circ 50' E$ )  
185 (<http://www.meteo.shom.fr/real-time/html/DYFAMED.html>) have been used (Fig.3d). Mean  
186 annual temperature are equal to  $18.29^\circ C$  and  $17.97^\circ C$  respectively, based on the  
187 meteorological buoy and the BOUSSOLE mooring data. The two sets of data differ  
188 essentially during July and August, with the temperatures at 3 m being colder than at 0.7 m,  
189 indicating a thermal gradient between the two depths during summer. Therefore, for 2013-  
190 2015, we select the mean annual value computed with the meteorological buoy,  $18.29^\circ C$ , as  
191 better representing the sea surface. This value is very close to  $18.21^\circ C$  computed for 1995-  
192 1997. Then, no significant change of SST is found between the 2 decades, with a mean value  
193 equal to  $18.25^\circ C$ .

### 194 3.2.2 Sea surface salinity changes

195 The mean value of salinity computed from 56 samples taken at BOUSSOLE in 2013-2015 is  
196 equal to  $38.19\pm 0.14$ . In 1998-1999, ship measurements of surface salinity were made during  
197 monthly cruises at the DYFAMED site [Copin-Montégut et al., 2004]. The mean salinity of  
198 this set of 19 data is equal to  $38.21\pm 0.12$ . Thus, there is no significant salinity change  
199 between the two decades.

200

## 201 3.3 Decadal changes of $fCO_2@13$

202 **3.3.1** Time series of  $f\text{CO}_2@13$  in 1995-1997 and 2013-2015

203 The two time series of high frequency data were analyzed in order to quantify the change of  
 204  $f\text{CO}_2@13$  at the sea surface two decades apart. To account for the interannual seasonal  
 205 variability as well as irregular sampling, we performed an analysis of the change of  $f\text{CO}_2@13$   
 206 as a function of SST (Fig. 3, a and b). For the 2013-2015 data set, we excluded summer data  
 207 measured at 10 m depth as they were not representative of the surface mixed layer due to a  
 208 strong stratification. Much larger  $f\text{CO}_2@13$  values are observed at low temperature than at  
 209 high temperature, the decrease being similar for the two studied periods and strongly non  
 210 linear. As described in section 3.1, large values at low temperature result from mixing with  
 211 enriched deep waters during winter and low values for  $26^\circ\text{C}$ - $28^\circ\text{C}$  temperatures occur at the  
 212 end of summer after biological drawdown of carbon. An increase of  $f\text{CO}_2@13$  between the 2  
 213 periods is clearly highlighted for the whole range of temperature.

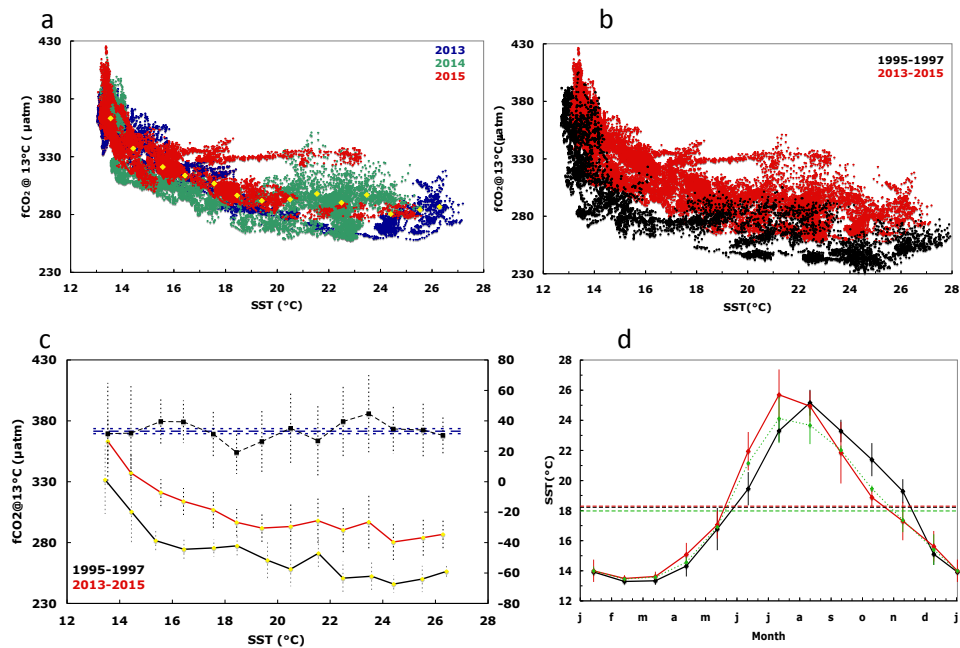

Fig.3. (a)  $f\text{CO}_2@13^\circ\text{C}$  as a function of temperature for hourly data in 2013, 2014 and 2015. The yellow dots indicate mean  $f\text{CO}_2@13^\circ\text{C}$  (b) as in (a) but for all hourly data in 1995-1997 (black) and in 2013-2015 (red) (c) As in (b), but for average values per  $1^\circ\text{C}$  interval (standard deviation as dotted line). The difference between the two periods is also displayed (dashed black curve; scale on the right axis). (d) Mean monthly sea surface temperature for 1993-1995 (black curve; CARIOCA sensors), 2013-2015 (green; CARIOCA sensors), 2013-2015 (red, meteorological buoy). Corresponding mean annual values are indicated by dotted lines.

214

215 **3.3.2** Trend analysis and statistics

216 To quantify the change of  $f\text{CO}_2@13$  between the two data sets, we proceed as follows: data  
 217 are binned by  $1^\circ\text{C}$  temperature intervals, thereby removing any potential seasonal weighting,  
 218 especially towards the  $13$ - $14^\circ\text{C}$  winter months temperature. The measurements made in this



219 temperature interval represent about 25% of the total number of data for both periods. For  
 220 each of the fourteen 1°C step, the mean and standard deviation of hourly fCO<sub>2</sub>@13  
 221 measurements are reported in Table 1 and on Fig. 3c.  
 222

| Time interval 1995-1997 |                              |      |                               | Time interval 2013-2015 |                              |      |                               | Temporal trend                |                               |
|-------------------------|------------------------------|------|-------------------------------|-------------------------|------------------------------|------|-------------------------------|-------------------------------|-------------------------------|
| T<br>°C                 | fCO <sub>2</sub> @13<br>µatm | N    | standard<br>deviation<br>µatm | T<br>°C                 | fCO <sub>2</sub> @13<br>µatm | N    | standard<br>deviation<br>µatm | dfCO <sub>2</sub> @13<br>µatm | standard<br>deviation<br>µatm |
| 13.45                   | 331.58                       | 1212 | 28.09                         | 13.55                   | 363.14                       | 6869 | 18.07                         | 31.56                         | 33.40                         |
| 14.45                   | 305.28                       | 495  | 26.02                         | 14.43                   | 337.16                       | 3270 | 16.65                         | 31.87                         | 30.89                         |
| 15.37                   | 281.54                       | 447  | 9.62                          | 15.57                   | 321.10                       | 3112 | 11.09                         | 39.56                         | 14.68                         |
| 16.44                   | 274.43                       | 182  | 8.53                          | 16.42                   | 313.79                       | 1818 | 11.09                         | 39.36                         | 13.99                         |
| 17.58                   | 275.54                       | 190  | 7.04                          | 17.56                   | 306.83                       | 1528 | 14.65                         | 31.29                         | 16.25                         |
| 18.47                   | 277.34                       | 300  | 9.04                          | 18.45                   | 296.57                       | 2621 | 10.95                         | 19.23                         | 14.20                         |
| 19.62                   | 265.43                       | 342  | 15.58                         | 19.41                   | 291.84                       | 1406 | 13.45                         | 26.40                         | 20.59                         |
| 20.50                   | 258.08                       | 529  | 14.15                         | 20.50                   | 293.16                       | 1135 | 18.21                         | 35.08                         | 23.06                         |
| 21.56                   | 271.15                       | 239  | 12.98                         | 21.54                   | 297.96                       | 1200 | 20.41                         | 26.82                         | 24.19                         |
| 22.49                   | 250.75                       | 742  | 13.66                         | 22.49                   | 290.27                       | 2385 | 18.57                         | 39.52                         | 23.05                         |
| 23.57                   | 252.22                       | 320  | 13.00                         | 23.47                   | 296.92                       | 747  | 21.77                         | 44.70                         | 25.36                         |
| 24.41                   | 245.85                       | 506  | 7.08                          | 24.40                   | 280.44                       | 959  | 14.82                         | 34.59                         | 16.43                         |
| 25.50                   | 250.06                       | 215  | 10.77                         | 25.53                   | 284.05                       | 456  | 14.81                         | 33.99                         | 18.31                         |
| 26.42                   | 256.29                       | 279  | 6.24                          | 26.29                   | 286.71                       | 249  | 11.23                         | 30.42                         | 12.85                         |

223

224

Table 1:

225 Distribution of temperature, fCO<sub>2</sub>@13, and increase dfCO<sub>2</sub>@13 data binned by 1°C  
 226 temperature interval for the 2 periods 1995-1997 and 2013-2015 .

227 The mean temperature within each 1° step differ for the two periods as the distribution of  
 228 individual measurements are not identical.

229 For both data sets, a monotonic relationship between fCO<sub>2</sub>@13 and T is observed with  
 230 correlation coefficients respectively equal to -0.861 and -0.857. The difference in fCO<sub>2</sub>@13  
 231 between the two periods, dfCO<sub>2</sub>@13, is derived in each temperature step, as the difference

232 between column 2 and 6 of Table 1. The variability of this difference is estimated as the  
 233 quadratic mean of the standard deviation in each time series. Both values are reported in  
 234 Table 1, column 9 and 10, and on Fig. 3c.

235 It is interesting to note that the distribution of values around the mean seems random  
 236 and indicates no trend dependency with SST (Fig. 3c). This suggests that the processes  
 237 which control the seasonal variation of  $f\text{CO}_2@13$  at the sea surface have not changed  
 238 over the last two decades. The mean weighted value of  $df\text{CO}_2@13$  over the whole range of  
 239 temperature is estimated as the mean of  $df\text{CO}_2@13$  in each temperature step weighted by the  
 240 variance. It is equal to  $32.7\mu\text{atm}$ . We estimate the accuracy on this value as follows. For each  
 241 time interval, the mean  $f\text{CO}_2@13$  per temperature step has been derived from at least three  
 242 independent CARIOCA sensors. Given that the accuracy on  $f\text{CO}_2$  from each CARIOCA  
 243 sensor is estimated at  $2\mu\text{atm}$  and that the calibrations of the three sensors are independent,  
 244 the accuracy on  $f\text{CO}_2$  averaged in each time interval is  $2/\sqrt{3}=1.15\mu\text{atm}$ . Hence the accuracy  
 245 on the difference is estimated at  $1.6\mu\text{atm}$ .

246

#### 247 3.4 Changes of seawater carbonate chemistry in surface waters

248 We estimated the DIC and pH changes related to the increase of  $f\text{CO}_2@13$  measured at the  
 249 sea surface 18 years apart, assuming a mean salinity equal to 38.2, a mean alkalinity equal to  
 250  $2562.3\mu\text{mol kg}^{-1}$  following equation (1), and a mean in situ temperature, T, equal to  $18.25^\circ\text{C}$ .  
 251 The dissociation constants of Mehrbach refitted by Dickson and Millero [*Dickson and*  
 252 *Millero, 1987; Mehrbach et al., 1973*] were used. pH is calculated on the seawater scale. We  
 253 compute an increase of DIC,  $d\text{DIC}$ , equal to  $24.8\pm 1.3\mu\text{mol kg}^{-1}$  ( $1.38\pm 0.07\mu\text{mol kg}^{-1}\text{yr}^{-1}$ )  
 254 and the decrease of pH,  $dp\text{H}$  equal to  $-0.0390\pm 0.0020$  pH unit ( $-0.0022\pm 0.0001$  pH unit<sup>1</sup>)  
 255 <sup>1</sup>) (Table 2).

|                                                             | $d f\text{CO}_2^*$<br>@ $13^\circ\text{C}$<br>$\mu\text{atm}$ | $d f\text{CO}_2^*$<br>@ T<br>$\mu\text{atm}$ | $d \text{DIC}^*$<br>$\mu\text{molkg}^{-1}$ | $d \text{pH}^*$<br>pH unit | $df\text{CO}_2@T$<br>annual<br>$\mu\text{atm yr}^{-1}$ | $d \text{DIC}$<br>annual<br>$\mu\text{molkg}^{-1}\text{yr}^{-1}$ | $d \text{pH}$<br>annual<br>pH unit $\text{yr}^{-1}$ |
|-------------------------------------------------------------|---------------------------------------------------------------|----------------------------------------------|--------------------------------------------|----------------------------|--------------------------------------------------------|------------------------------------------------------------------|-----------------------------------------------------|
| sea<br>surface                                              | 32.7<br>+/-1.6                                                | 40.8<br>+/-2.0                               | 24.8<br>+/-1.3                             | -0.0390<br>+/-0.0020       | 2.27<br>+/-0.11                                        | 1.38<br>+/-0.07                                                  | -0.0022<br>+/-0.0001                                |
| atmosphere<br>Lampedusa data                                |                                                               | 34.3<br>+/-1.2                               | **20.8<br>+/-0.8                           |                            | 1.91<br>+/-0.07                                        |                                                                  |                                                     |
| $df\text{CO}_2@T_{\text{air}}/df\text{CO}_2@T_{\text{sea}}$ |                                                               | 0.84<br>+/-0.05                              |                                            |                            |                                                        |                                                                  |                                                     |

256

257  
258  
259  
260  
261  
262  
263  
264  
265  
266  
267  
268  
269  
270  
271  
272  
273  
274  
275  
276  
277  
278  
279  
280  
281  
282  
283  
284  
285  
286  
287  
288  
289  
290

Table 2

Seasonally detrended long term and annual trends of seawater carbonate chemistry and atmosphere composition.

T, mean annual temperature equal to 18.25°C

\*, Change from 1995-1997 to 2013-2015.

\*\*,  $\Delta\text{DIC}_{\text{ant}}$

### 3.5 Changes in atmospheric and seawater $\text{fCO}_2$

The increase of atmospheric  $\text{fCO}_2$  from 1995-1997 to 2013-2015 was computed from the monthly atmospheric  $\text{xCO}_2$  concentrations measured at the Lampedusa Island station (Italy) (35°31'N, 12°37'E) (<http://ds.data.jma.go.jp/gmd/wdcgg/>) (see equation 3 in [Hood and Merlivat, 2001]). Considering a mean annual in situ temperature equal to 18.25°C and an atmospheric pressure equal to 1 atm, we derived a mean atmospheric  $\text{fCO}_2$  equal to 355.3±0.8  $\mu\text{atm}$  and 389.6±0.9  $\mu\text{atm}$  for 1995-1997 and 2013-2015, that is an increase equal to 34.3±1.2  $\mu\text{atm}$  (Table 2). At this temperature, the change of  $\text{fCO}_2$  at the sea surface is equal to 40.8±2.0  $\mu\text{atm}$ . Thus the contribution of the increase in atmospheric  $\text{CO}_2$  is responsible for 84±5 % of the increase of  $\text{fCO}_2$  measured in the surface waters. Assuming the same salinity and alkalinity as previously, the corresponding amount of anthropogenic carbon taken up from the atmosphere in order to maintain a chemical equilibrium at the sea surface would be equal to 20.8±0.8  $\mu\text{mol kg}^{-1}$  (Table 2).

## 4 Discussion

### 4.1 $\text{fCO}_2$ at the air-sea interface

We have computed that 84% of the increase of  $\text{fCO}_2_{\text{sea}}$  in the northwestern Mediterranean, two decades apart, comes from the atmosphere. One implicit assumption is that any change in atmospheric  $\text{fCO}_2$  immediately transfers as a change in the surface ocean  $\text{fCO}_2$ . In agreement with the circulation pattern of the basin [Millot, 1999], this increase of surface  $\text{fCO}_2$  could follow two routes: in situ chemical equilibrium at the air-sea interface or winter mixing with DIC rich Levantine Intermediate water or surface waters of Atlantic origin, relatively enriched in anthropogenic carbon. Keeping in mind that the deep-water renewal time is estimated to be 20-40 years in the western basin, and given that the atmospheric increase was slower 20-40 years ago, our estimate of the atmospheric contribution to the ocean trend is likely an upper bound.

The mean values of  $\text{fCO}_2$  computed at the mean annual SST, 18.25°C, computed with all the

291 individual hourly  $f\text{CO}_2$  measurements in 1995-1997 and 2013-2015 are respectively equal to  
292 352.3  $\mu\text{atm}$  and 400.2  $\mu\text{atm}$ , while the corresponding atmospheric values are 355.3  $\mu\text{atm}$  and  
293 389.6  $\mu\text{atm}$  respectively. The  $\text{CO}_2$  annual flux is directed from the atmosphere to the sea in  
294 both cases, although the annual average of  $f\text{CO}_2$  in surface seawater in 2013-2015 is higher  
295 than atmospheric  $f\text{CO}_2$ . This is due to higher wind speed in autumn and winter when the  
296 surface water is undersaturated (Fig.2, b).

297

#### 298 4.2 Time change of surface alkalinity?

299 In the range of salinity of the BOUSSOLE samples, 37.9 to 38.5 psu, the alkalinity values  
300 computed with Eq (1) are larger than those predicted by the [Copin-Montegut and Begovic,  
301 2002] relationship established for the DYFAMED site, with a mean difference equal to  $10\pm$   
302  $2 \mu\text{mol kg}^{-1}$ . In both cases alkalinity measurements were made with a potentiometric method  
303 using certified reference material supplied by AG Dickson for calibration.

304 It is difficult to identify the cause for a possible change of alkalinity between the 2 periods, 18  
305 years apart, while no salinity change has been observed. At a coastal site 50 km away from  
306 DYFAMED, [Kapsenberg *et al.*, 2017] have measured an increase of alkalinity unrelated to  
307 salinity over the period from 2007 to 2015. They attribute it to changes in freshwater inputs  
308 from land. However, based on data from Coppola *et al.*, [2016], alkalinity in the upper 50m at  
309 DYFAMED did not change significantly from 2007 through 2014 ( $3.204 \mu\text{mol kg}^{-1}$ ,  
310  $P=0.0794$ ,  $r^{*2}=0.08$ ). Thus, we cannot conclude on whether the difference observed at  
311 DYFAMED/BOUSSOLE between the two periods is real or an artifact of measurement  
312 techniques. However, as a sensitivity test, if we compute the expected changes of DIC and pH  
313 from 1995-1997 to 2013-2015 for a mean alkalinity increase of  $10 \mu\text{mol kg}^{-1}$ , we get annual  
314 changes,  $d\text{DIC}=+0.46 \mu\text{mol kg}^{-1}\text{yr}^{-1}$  and  $d\text{pH}=-0.0001 \text{ pH unit yr}^{-1}$ . Such a change in  
315 alkalinity does not significantly affect the decrease of pH shown in Table 2.

316

#### 317 4.3 Anthropogenic carbon storage in surface waters

318 The increase of sea surface DIC from 1995-1997 to 2013-2015 is equal to  $24.8\pm 1.3 \mu\text{mol}$   
319  $\text{kg}^{-1}$  (Table 2). ( $d\text{DIC}_{\text{ant}}$ ) predicted solely from chemical equilibrium of the sea surface with  
320 the atmosphere is equal to  $20.8\pm 0.8 \mu\text{mol kg}^{-1}$ . The ratio of these two terms is equal to  
321  $0.84\pm 0.05$ . In order to interpret the additional contribution of DIC to that resulting from the  
322 local  $\text{CO}_2$  air-sea exchange, we examine below two processes, respectively an increased  
323 mixing with deep waters and an anthropogenic carbon invasion.

324 MLD time series show a strong variability in winter at interannual scale. During the two  
325 periods, 1995-1997 and 2013-2015, the winter MLD never exceeded 220 m, whereas values  
326 over 300 m were observed in 1999 and especially in February and March 2006 with values  
327 close to 2000 m [Coppola et al., 2016; Pasqueron de Fommervault et al., 2015]. These  
328 episodes of strong and deep vertical mixing must have entrained DIC rich LIW in the surface  
329 waters. This could be a cause for the observed increase of DIC measured between the two  
330 periods 1995 -1997 and 2013-2015.

331 As a result of a monitoring program in the Strait of Gibraltar, [Huertas et al., 2009]  
332 calculated a net flux of  $C_{\text{ant}}$  from the Atlantic towards the Mediterranean basin. [Schneider et  
333 al., 2010], using the transit time distribution method applied to a dataset from a cruise in the  
334 Mediterranean Sea in 2001, estimated that the input of  $C_{\text{ant}}$  through the Strait of Gibraltar  
335 from 1850 to 2001 accounts for almost 10% of the total  $C_{\text{ant}}$  inventory of the Mediterranean  
336 Sea, which means that ~90% must have been taken up directly from the atmosphere. Based on  
337 a high-resolution regional model, [Palmiéri et al., 2015] computed the anthropogenic carbon  
338 storage in the Mediterranean basin. They concluded that 75% of the total storage of  $C_{\text{ant}}$  in the  
339 whole basin comes from the atmosphere and 25% from net transport from the Atlantic across  
340 the Strait of Gibraltar. The findings of these two studies support the conclusion that computed  
341 change of DIC in excess of 16+/-5% over the direct contribution of air-sea exchange could  
342 result from the anthropogenic carbon input from the Atlantic Ocean towards the  
343 Mediterranean basin. [Huertas et al., 2009] and [Schneider et al., 2010] report  $\text{DIC}_{\text{ant}}$  surface  
344 concentrations respectively equal to 65-70  $\mu\text{mol kg}^{-1}$  at the strait of Gibraltar in the years  
345 2005-2007 and close to 65  $\mu\text{mol kg}^{-1}$  in the western basin in 2001. We extrapolate these  
346 figures to the year 2014, assuming a mean increase rate of DIC equal to 1.38  $\mu\text{mol kg}^{-1}\text{yr}^{-1}$  as  
347 previously computed (Table 2). Taking into account the increase of  $\text{DIC}_{\text{ant}}$  equal to 24.8  $\mu\text{mol}$   
348  $\text{kg}^{-1}$  between 1995-1997 and 2013-2015, we would estimate that the contribution of the  
349 change of  $\text{DIC}_{\text{ant}}$  over the last 18 years represents ~30% of the total change since the  
350 beginning of the industrial period ( $t > \sim 1800$ ).

351

#### 352 4.4 The signal of acidification

353 The annual decrease of  $\text{pH}_T$  calculated between 1995-1997 and 2013-2015 is equal to -  
354 0.0022+/-0.0001. At the DYFAMED site, at 10 m depth, [Marcellin Yao et al., 2016] studied  
355 the time variability of pH over 1995-2011, based on measurements of T, S, Alk and DIC  
356 sampled approximately once a month. They computed a mean annual decrease of  $-0.003 \pm$   
357 0.001 pH units on the seawater scale that is not significantly different from our estimate.

358 [Bates *et al.*, 2014] examined changes in surface seawater CO<sub>2</sub>-carbonate chemistry at the  
359 locations of seven ocean CO<sub>2</sub> time series that have been gathering sustained observations  
360 from 15 to 30 years with monthly or seasonal sampling. The range of decreasing trends of pH  
361 extends from -0.0026±0.0006 unit yr<sup>-1</sup> at the Irminger Sea time series site to -0.0014±  
362 0.0005 unit yr<sup>-1</sup> at the Iceland Sea time series. For the global surface ocean, [Lauvset *et al.*,  
363 2015] have reported a mean rate of decrease of -0.0018±0.0004 for 1991-2011. The decrease  
364 of pH computed here at DYFAMED is in the upper range of values compared to other time  
365 series. The Mediterranean Sea is actually able to absorb more anthropogenic CO<sub>2</sub> per unit  
366 area, first because of its higher total alkalinity that leads to a greater chemical capacity to take  
367 up anthropogenic CO<sub>2</sub> and, second, because deep waters are ventilated on relatively short  
368 timescales (30-40 years in the western basin), which allows deeper penetration of  
369 anthropogenic tracers [Schneider *et al.*, 2010], [Palmiéri *et al.*, 2015]. The lowering effect of  
370 high alkalinity on the Revelle factor, close to ten, implies a relatively high uptake capacity for  
371 anthropogenic carbon, C<sub>ant</sub>.

372

## 373 **5 Conclusion**

374 High-frequency ocean fCO<sub>2</sub> measurements made by CARIOCA sensors were sufficient to  
375 estimate trends in fCO<sub>2</sub>, DIC and pH over a period of two decades, notwithstanding a  
376 considerable short-time and natural seasonal variability of these properties at the sea surface.  
377 We have estimated a large change of sea surface carbonate chemistry, an increase of DIC and  
378 a decrease of pH. The computed increase of DIC is larger than the change expected from  
379 chemical equilibrium with atmospheric CO<sub>2</sub>. This could be the result of a strong interannual  
380 variability of the winter mixing as observed between the two periods 1993-1995 and 2013-  
381 2015. Likewise, our results support modeling work and analysis of vertical profiles  
382 measurements that suggest that the Atlantic Ocean contributes as a source of anthropogenic  
383 carbon towards the Mediterranean basin, close to 10% ([Schneider *et al.*, 2010] or 25%  
384 [Palmiéri *et al.*, 2015]).

385

386 *Data availability:* Time series data from Dyfamed (1995-1997) are available in the SOCAT v3  
387 database. Boussole data (2013-2015) will be available in SOCAT v6.

388

## 389 **Acknowledgments**

390 Seawater samples were analyzed for DIC and Alk by the SNAPO-CO<sub>2</sub> at LOCEAN in Paris.  
391 The CO<sub>2</sub>Sys toolbox of [Pierrot *et al.*, 2006] has been used for the calculations of DIC and

392 pH. The adaptation of CARIOCA sensors to high pressure has been supported by the BIO-  
393 optics and CARbon EXperiment (BIOCAREX) project, funded by the Agence Nationale de la  
394 Recherche (ANR,Paris). We are grateful for helpful comments from Gilles Reverdin on the  
395 manuscript. Many thanks to Laurent Coppola who kindly provided additional MLD data at  
396 Dyfamed.

397

## 398 **References**

399

400 Antoine, D., F. d'Ortenzio, S. B. Hooker, G. Bécu, B. Gentili, D. Tailliez, and A. J. Scott  
401 (2008), Assessment of uncertainty in the ocean reflectance determined by three satellite  
402 ocean color sensors (MERIS, SeaWiFS and MODIS-A) at an offshore site in the  
403 Mediterranean Sea (BOUSSOLE project), *Journal of Geophysical Research*, 113(C7).

404 Antoine., and others (2006), BOUSSOLE: A Joint CNRS-INSU,ESA, CNES and NASA ocean  
405 color calibration and validation activity., *NASA Tech. Memo. 2006-214147*.

406 Bakker, D. C. E., et al. (2014), An update to the Surface Ocean CO<sub>2</sub> Atlas  
407 (SOCAT version 2), *Earth Syst. Sci. Data*, 6(1), 69-90.

408 Bates, N., Y. Astor, M. Church, K. Currie, J. Dore, M. Gonaález-Dávila, L. Lorenzoni, F.  
409 Muller-Karger, J. Olafsson, and M. Santa-Casiano (2014), A Time-Series View of Changing  
410 Ocean Chemistry Due to Ocean Uptake of Anthropogenic CO<sub>2</sub> and Ocean Acidification,  
411 *Oceanography*, 27(1), 126-141.

412 Begovic , M., and C. Copin-Montegut (2002), Processes controlling annual variations in  
413 the partial pressure of fCO<sub>2</sub> in surface waters of the central northwestern  
414 Mediterranean sea (Dyfamed site), *Deep-Sea Research II*, 49, 2031-2047.

415 Chen, G. T., and F. J. Millero (1979), Gradual increase of oceanic CO<sub>2</sub>, *Nature*, 277, 205-  
416 206.

417 Copin-Montegut, C., and M. Begovic (2002), Distributions of carbonate properties and  
418 oxygen along the water column (0–2000 m) in the central part of the NW Mediterranean  
419 Sea (Dyfamed site): influence of winter vertical mixing on air–sea CO<sub>2</sub> and O<sub>2</sub>  
420 exchanges, *Deep-Sea Research II* 49, 2049-2066.

421 Copin-Montégut, C., M. Bégovic, and L. Merlivat (2004), Variability of the partial pressure  
422 of CO<sub>2</sub> on diel to annual time scales in the Northwestern Mediterranean Sea, *Mar Chem*,  
423 85(3-4), 169-189.

424 Coppola, L., E. Diamond Riquier, and T. Carval (2016), Dyfamed observatory data,  
425 *SEANOE*.

426 Dickson, A. G., and F. J. Millero (1987), A comparison of the equilibrium constants for the  
427 dissociation of carbonic acid in seawater media, *Deep Sea Research Part A*.  
428 *Oceanographic Research Papers*, 34(10), 1733-1743.

429 Edmond, J. M. (1970), High precision determination of titration alkalinity and total  
430 carbon dioxide content of seawater by potentiometric titration, *Deep Sea research* 17(4),  
431 737-750.

432 Gattuso, J.-P., and L. Hansson (2011), Ocean Acidification, *Oxford University Press*, 352  
433 pp.

434 Gruber, N., J. L. Sarmiento, and T. F. Stocker (1996), An improved method for detecting  
435 anthropogenic CO<sub>2</sub> in the oceans, *Global Biogeochem Cy*, 10, 809-837.

436 Heimbürger, L.-E., H. Lavigne, C. Migon, F. D'Ortenzio, C. Estournel, L. Coppola, and J.-C.  
437 Miquel (2013), Temporal variability of vertical export flux at the DYFAMED time-series  
438 station (Northwestern Mediterranean Sea), *Progress In Oceanography*, 119, 59-67.

439 Hood, E. M., and L. Merlivat (2001), Annual and interannual variations of fCO<sub>2</sub> in the  
440 northwestern Mediterranean Sea: Results from hourly measurements made by CARIOCA  
441 buoys, 1995-1997, *J Mar Res*, 59, 113-131.

442 Huertas, I. E., A. F. Ríos, J. García-Lafuente, A. Makaoui, S. ` Rodríguez-Gálvez, A. Sánchez-  
443 Román, A. Orbi, J. Ruíz, and F. F. and Pérez (2009), Anthropogenic and natural CO<sub>2</sub>  
444 exchange through the Strait of Gibraltar, *Biogeosciences*, 6, 647-662.

445 Kapsenberg, L., S. Alliouane, F. Gazeau, L. Mousseau, and J.-P. Gattuso (2017), Coastal  
446 ocean acidification and increasing total alkalinity in the northwestern Mediterranean  
447 Sea, *Ocean Science*, 13(3), 411-426.

448 Lauvset, S. K., N. Gruber, P. Landschützer, A. Olsen, and J. Tjiputra (2015), Trends and  
449 drivers in global surface ocean pH over the past 3 decades, *Biogeosciences*, 12(5), 1285-  
450 1298.

451 Marcellin Yao, K., O. Marcou, C. Goyet, V. Guglielmi, F. Touratier, and J.-P. Savy (2016),  
452 Time variability of the north-western Mediterranean Sea pH over 1995-2011, *Marine*  
453 *Environmental Research*, 116, 51-60.

454 Marty, J. C., J. Chiaverini, M. Pizay, D., and B. Avril (2002), Seasonal and interannual  
455 dynamics of nutrients and phytoplankton pigments in the western Mediterranean Sea at  
456 the DYFAMED time-series station (1991-1999), *Deep-Sea Research II*, 49, 1965-1985.



457 McKinley, G. A., A. R. Fay, T. Takahashi , and N. Metzl (2011), Convergence of  
458 atmospheric and North Atlantic carbon dioxide trends on multidecadal timescales,  
459 *Nature Geoscience*, 4, 606-610.

460 Mehrbach, C., C. H. Culberson, J. E. Hawley, and R. M. Pytkowicz (1973), Measurement of  
461 the apparent dissociation constants of carbonic acid in seawater at atmospheric  
462 pressure, *Limnol Oceanogr*, 18(6), 897-907.

463 Merlivat, L., and P. Brault (1995), CARIOCA BUOY: Carbon Dioxide Monitor, *Sea*  
464 *Technol*(October), 23-30.

465 Millero, F. J. (2007), The marine inorganic carbon cycle, *Chemical reviews*, 107(2), 308-  
466 341.

467 Millot (1999), Circulation in the Western Mediterranean Sea, *Journal of Marine Systems*,  
468 20, 423-442.

469 Palmiéri, J., J. C. Orr, J. C. Dutay, K. Béranger, A. Schneider, J. Beuvier, and S. Somot  
470 (2015), Simulated anthropogenic CO<sub>2</sub> storage and acidification of the Mediterranean  
471 Sea, *Biogeosciences*, 12(3), 781-802.

472 Pasqueron de Fommervault, O., C. Migon, F. D'Ortenzio, M. Ribera d'Alcalà, and L.  
473 Coppola (2015), Temporal variability of nutrient concentrations in the northwestern  
474 Mediterranean sea (DYFAMED time-series station), *Deep Sea Research Part I:*  
475 *Oceanographic Research Papers*, 100, 1-12.

476 Pierrot, D., E. Lewis, and D. W. R. Wallace (2006), MS excel program developed for CO<sub>2</sub>  
477 system calculations, *In: Carbon Dioxide Information Analysis Center (ed.O.R.N.L.).*  
478 *US.Department of Energy, Oak Ridge, TN.*

479 Sabine, C. L., R. A. Feely, F. J. Millero, A. G. Dickson, C. Langdon, S. Mecking, and D. Greeley  
480 (2008), Decadal changes in Pacific carbon, *J.Geophys.Res.*, 113(C07021).

481 Schneider, A., T. Tanhua, A. Körtzinger, and D. W. R. Wallace (2010), High anthropogenic  
482 carbon content in the eastern Mediterranean, *Journal of Geophysical Research*, 115(C12).

483 Takahashi , T., J. Olafson, J. G. Goddard, D. W. Chipman , and G. Sutherland (1993),  
484 Seasonal variations of CO<sub>2</sub> and nutrients in the high-latitude surface oceans:a  
485 comparative study, *Global Biogeochem Cy*, 7(4), 843-878.

486 Touratier, F., and C. Goyet (2004), Applying the new TrOCA approach to assess the  
487 distribution of anthropogenic CO<sub>2</sub> in the Atlantic Ocean, *Journal of Marine Systems*, 46(1-  
488 4), 181-197.

489 Touratier, F., and C. Goyet (2009), Decadal evolution of anthropogenic CO<sub>2</sub> in the  
490 northwestern Mediterranean Sea from the mid-1990s to the mid-2000s, *Deep Sea*  
491 *Research Part I: Oceanographic Research Papers*, 56(10), 1708-1716.

492 Woosley, R. J., F. J. Millero, and R. Wanninkhof (2016), Rapid anthropogenic changes in  
493 CO<sub>2</sub> and pH in the Atlantic Ocean: 2003-2014, *Global Biogeochem Cy*, 30(1), 70-90.

494

495

496

496

## Figure caption and tables

497 Figure 1. The area of the northwestern Mediterranean Sea showing the southern coast of  
498 France, the Island of Corsica, the main current branches (gray arrows), and the location of the  
499 DYFAMED site (43°25'N, 7°52'E, red star) and the BOUSSOLE buoy (43°22'N, 7°54'E,  
500 black star) in the Ligurian Sea.

501

502 Figure 2. Interannual variability of CARIOCA data: a) T, b) fCO<sub>2</sub>, c) fCO<sub>2</sub>@13. The dotted  
503 lines indicate the period affected by stratification and internal waves (July, 26<sup>th</sup> to October  
504 1<sup>st</sup>, 2014 and July, 8<sup>th</sup> to October 1<sup>st</sup>, 2015). On 2(b), the open circles correspond to fCO<sub>2</sub>  
505 data derived from DIC and alkalinity measurements of samples taken at 5 and 10 meters. (d),  
506 (e), (f), seasonal variability. On 2(e), the thin lines indicate fCO<sub>2atm</sub>. Note that the color code  
507 on (d), (e), (f) is different from (a), (b), (c).

508

509 Figure 3. (a) fCO<sub>2</sub>@13 as a function of temperature for hourly data in 2013, 2014 and  
510 2015. The yellow dots indicate mean fCO<sub>2</sub>@13 (b) as in (a) but for all hourly data in 1995-  
511 1997 (black) and in 2013-2015 (red) (c) As in (b), but for average values per 1°C interval  
512 (standard deviation as dotted line). The difference between the two periods is also displayed  
513 (dashed black curve; scale on the right axis). (d) Mean monthly sea surface temperature for  
514 1993-1995 (black curve; CARIOCA sensors), 2013-2015 (green; CARIOCA sensors), 2013-  
515 2015 (red, meteorological buoy). Corresponding mean annual values are indicated by dotted  
516 lines.

517

518 Table 1:

519 Distribution of temperature, fCO<sub>2</sub>@13, and increase dfCO<sub>2</sub>@13 data binned by 1°C  
520 temperature interval for the 2 periods 1995-1997 and 2013-2015 .

521 The mean temperature within each 1° step differ for the two periods as the distribution of  
522 individual measurements are not identical.

523

524 Table 2

525 Seasonally detrended long term and annual trends of seawater carbonate chemistry and  
526 atmosphere composition.

527 T, mean annual temperature equal to 18.25°C

528 \*, Change from 1995-1997 to 2013-2015.

529 \*\*, dDIC<sub>ant</sub>
